# Supplementary material for: High-definition conductive silver patterns on polyimide film via an ion exchange plating method
Source: Royal Society of Chemistry journal article supplement (doi:10.1039/c5ra23694k), 2016-01-01
Supplement: c5ra23694k1.pdf [file c5ra23694k1.pdf]

## Supporting Information

### High-definition Conductive Silver Patterns on Polyimide Film via an Ion Exchange Plating Method

Yanqing Wang,<sup>a</sup> Ning Li,<sup>a,\*</sup> Xianliang Wang,<sup>b</sup> Dana Havas,<sup>b</sup> Deyu Li,<sup>a,b</sup> and Gang  
Wu<sup>b,\*</sup>

<sup>a</sup>*School of Chemical Engineering & Technology, Harbin Institute of Technology,  
Harbin 150001, China*

<sup>b</sup>*Department of Chemical and Biological Engineering, University at Buffalo, The  
State University of New York, Buffalo, NY 14260, United States*

\* Corresponding authors: E-mail addresses:  
[gangwu@buffalo.edu](mailto:gangwu@buffalo.edu) (G. Wu); [lininghit@263.net](mailto:lininghit@263.net) (N. Li)

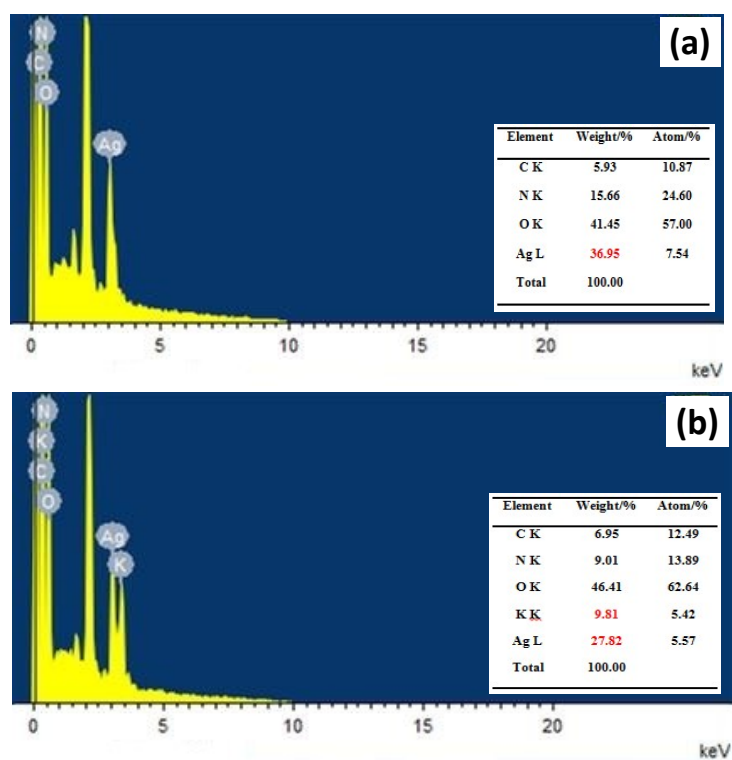

**Figure S1** EDS results of circular ( $\Phi 3\text{cm}$ ) silver pattern fabricated on polyimide film before and after Neutralizing regeneration process. (a) EDS results before Neutralization regeneration process. (b) EDS results after Neutralizing regeneration process. (Note: IEP repetitions  $n=1$ )

**Table S1** The influence of t(A) and the IEP repetitions n on the performance of circular( $\Phi 3\text{cm}$ ) silver pattern on polyimide film prepared by an IEP method via mask technology.

| t(A)  | n  | d/ $\mu\text{m}$ | $R_{\square}/(\Omega/\text{cm}^2)$ | $\rho/\mu\Omega\cdot\text{cm}$ |
|-------|----|------------------|------------------------------------|--------------------------------|
| 10min | 5  | 0.40             | 0.227                              | 9.08                           |
| 1min  | 2  | 0.03             | -                                  | -                              |
| 1min  | 5  | 0.06             | -                                  | -                              |
| 1min  | 15 | 0.23             | 0.281                              | 6.46                           |

Note: Alkali modification condition: mass(KOH): mass( $\text{H}_2\text{O}$ ): mass( $\text{C}_3\text{H}_8\text{O}_3$ )=1:1:1, room temperature.

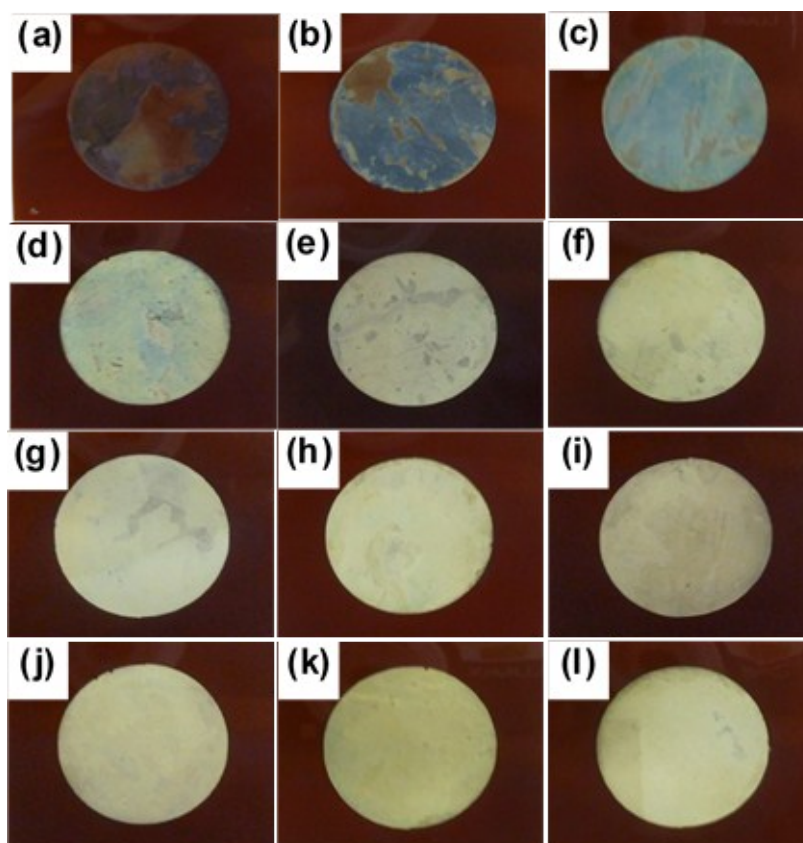

**Figure S2** The digital photographs of circular ( $\Phi 3\text{cm}$ ) silver patterns fabricated by an IEP method via mask technology under different IEP repetitions n. (a)  $n=1$ , (b)  $n=3$ , (c)  $n=5$ , (d)  $n=7$ , (e)  $n=9$ , (f)  $n=11$ , (g)  $n=13$ , (h)  $n=15$ , (i)  $n=17$ , (j)  $n=19$ , (k)  $n=21$  and (l)  $n=23$ .

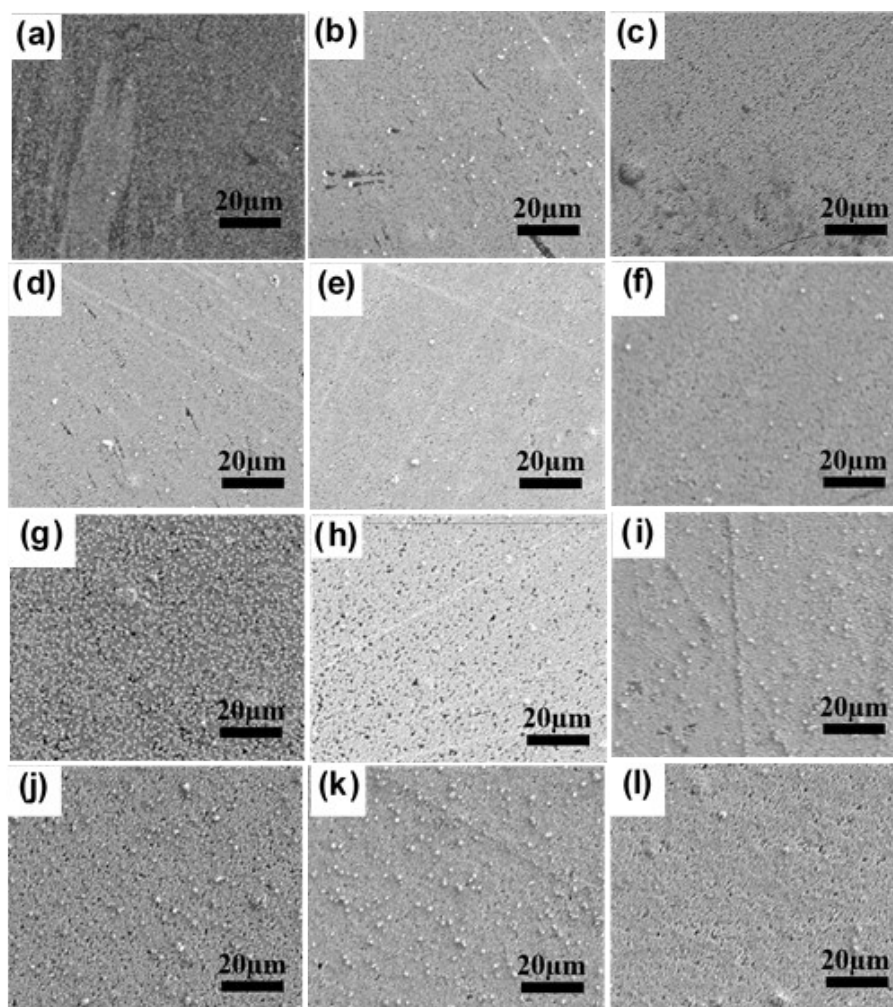

**Figure S3** SEM images of circular ( $\Phi 3\text{cm}$ ) silver patterns fabricated by IEP method via mask technology under different IEP repetitions  $n$ . (a)  $n=1$ , (b)  $n=3$ , (c)  $n=5$ , (d)  $n=7$ , (e)  $n=9$ , (f)  $n=11$ , (g)  $n=13$ , (h)  $n=15$ , (i)  $n=17$ , (j)  $n=19$ , (k)  $n=21$ , (l)  $n=23$ .
